# Supplementary material for: Effects and Mechanisms of Saikosaponin D Improving the Sensitivity of Human Gastric Cancer Cells to Cisplatin
Source: PubMed Central journal article supplement — ACS Omega. 2021 Jul 12;6(29):18745–55. doi: 10.1021/acsomega.1c01795 (PMC8319933; doi:10.1021/acsomega.1c01795), 2021-07-12
Supplement: ao1c01795_si_001.pdf [file ao1c01795_si_001.pdf]

# **The effects and mechanisms of saikosaponin D improving the sensitivity of human gastric cancer cells to cisplatin**

**Jianran Hu<sup>1,2</sup>, Ping Li<sup>1,2\*</sup>, Baozhong Shi<sup>2</sup>, Jun Tie<sup>2</sup>**

<sup>1</sup> Department of biological science and technology, Jinzhong University, Jinzhong, China

<sup>2</sup> Department of biological science and technology, Changzhi University, Changzhi, China

\*Corresponding Author

E-mail: hitliping@163.com

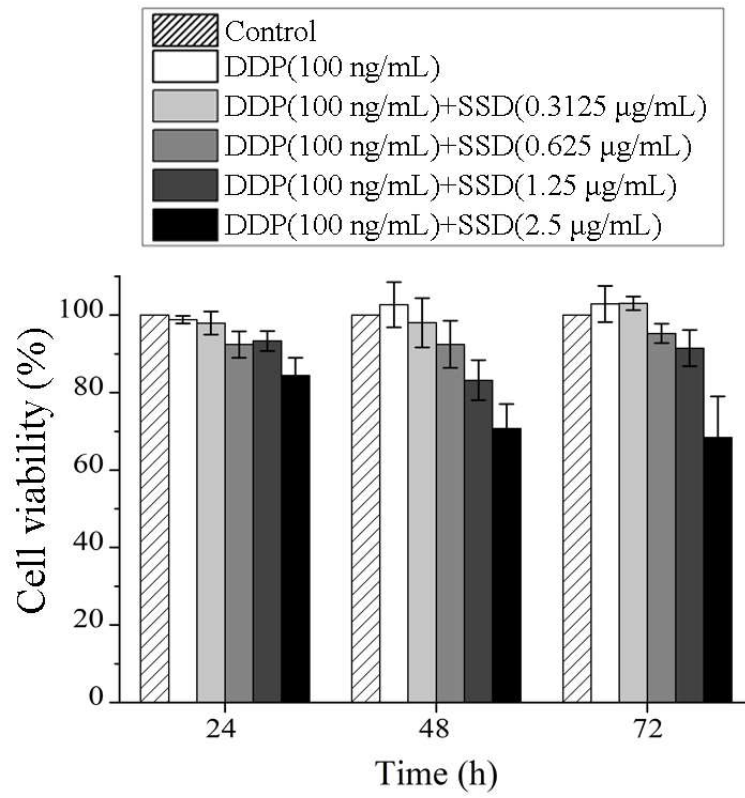

Figure S1. Effects of SSD combined with DDP on GES-1.

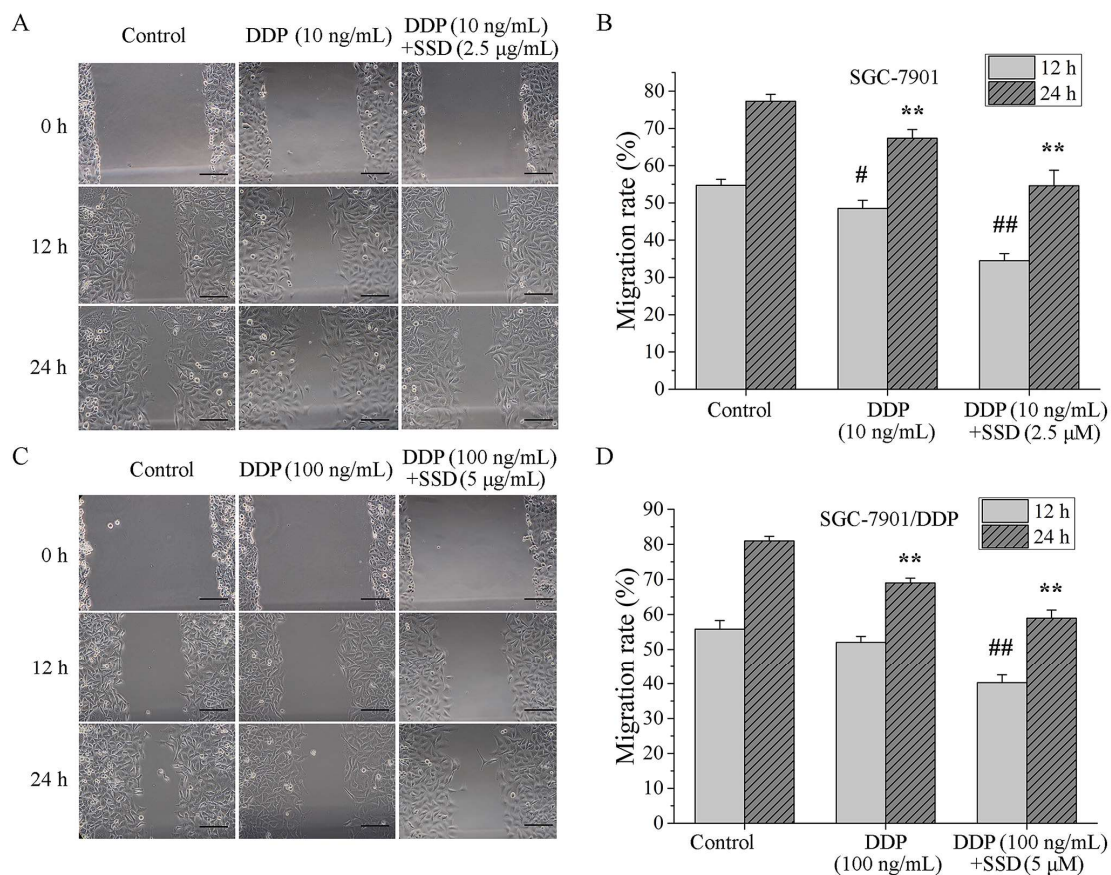

Figure S2. Effects of SSD combined with DDP on cell migration. Wound healing assay was conducted in SGC-7901 (A) and SGC-7901/DDP (C) cells, respectively. The width of the scratch was statistically analyzed (B and D). \* $p < 0.05$ , \*\* $p < 0.01$ , compared with control after 12 h. # $p < 0.05$ , ## $p < 0.01$ , compared with control after 24 h.
